# Supplementary material for: An investigation into the avoidability of drug reaction with eosinophilia and systemic symptoms (DRESS) syndrome
Source: Research Square preprint supplement (doi:10.21203/rs.3.rs-408287/v1), 2021-04-16
Supplement: Supplementary file 1 [file 3a1669fbd4224bc136a47ffa.docx]

**Table 1: Baseline characteristics of the study population (*N = 16*)**

| Variable | *N* = 16 | “Not avoidable” # | “Possibly/definitely avoidable” |
| --- | --- | --- | --- |
| Age (years)  Mean (SD) | 41.5 (13.3) | - | - |
| Gender (Male)  N (%) | 12 (75) | - | - |
| AST Median (IQR) | 50 (27 124) | - | - |
| ALT Median (IQR) | 56 (22 160) | - | - |
| ALP | 115 (97, 145) | - | - |
| Albumin | 34 (25, 38) | - | - |
| PT |  | - | - |
| Neutrophils | 2.5 (23.5, 67) | - | - |
| Eosinophils (×10³ cells/μL)  Median (IQR) | 4.5 (2.4, 7.5) | - | - |
| EGFR*7 (mls/min/1.73m2  Median (IQR) | 60 (60,107) | - |  |
| Drug latent period (days)  Median (IQR) | 14 (6.4, 29.2) | - | - |
| Extent of skin rash (>50%) | 9/16 |  |  |
| Internal organ involvement  Liver (%)  Kidneys (%) | 25  37.5 |  |  |
| RegiSCAR  Median (IQR) | 6 (5, 6,8) |  |  |
| J-SCAR  *Median (IQR)* | 5 (4, 5.8) |  |  |
| Implicated drugs |  |  |  |
| Amoxicillin (2) |  |  | 3 |
| Allopurinol (3) |  | 3 | 1 |
| Ibuprofen |  |  | 2 |
| Naproxen |  | 1 |  |
| Ceftriaxone |  | 3 |  |
| Piperacillin/tazobactam |  |  | 1 |
| Desloratadine |  | 1 |  |
| Dasatanib |  |  | 1 |

#: Determined by LAAT

SD: Standard Deviation; AST: Aspartate Aminotransferase; ALT: Alanine Aminotransferase; ALP: Alkaline Phosphatase; PT: Prothrombin time; IQR: Interquartile range; EGFR: Estimated Glomerular Filtration Rate
